# Supplementary material
Source: publisher figshare collection journal article supplement (https://acs.figshare.com/ndownloader/files/3894874)

## Supporting Information

Manganese nanoparticle: impact on non-nodulated plant as a potent enhancer in nitrogen metabolism and toxicity study both in vivo and in vitro

*Saheli Pradhan\*<sup>a</sup>, Prasun Patra<sup>b</sup>, Shouvik Mitra<sup>a</sup>, Kushal Kumar Dey<sup>c</sup>, Sneha Jain<sup>a</sup>, Samapd Sarkar<sup>a</sup>, Shuvrodeb Roy<sup>a</sup>, Pratip Palit<sup>d</sup>, Arunava Goswami<sup>a</sup>*

<sup>a</sup>Biological Sciences Division, Indian Statistical Institute, 203 B.T. Road, Kolkata 700108, India.

<sup>b</sup>Centre for Research in Nanoscience and Nanotechnology, University of Calcutta, Kolkata, 700098, India.

<sup>c</sup>Department of Statistics, University of Chicago

<sup>d</sup>Plant Physiology Section, Central Research Institute for Jute and Allied Fibres, Indian Council of Agricultural Research, Barrackpore, Kolkata 700 120, India

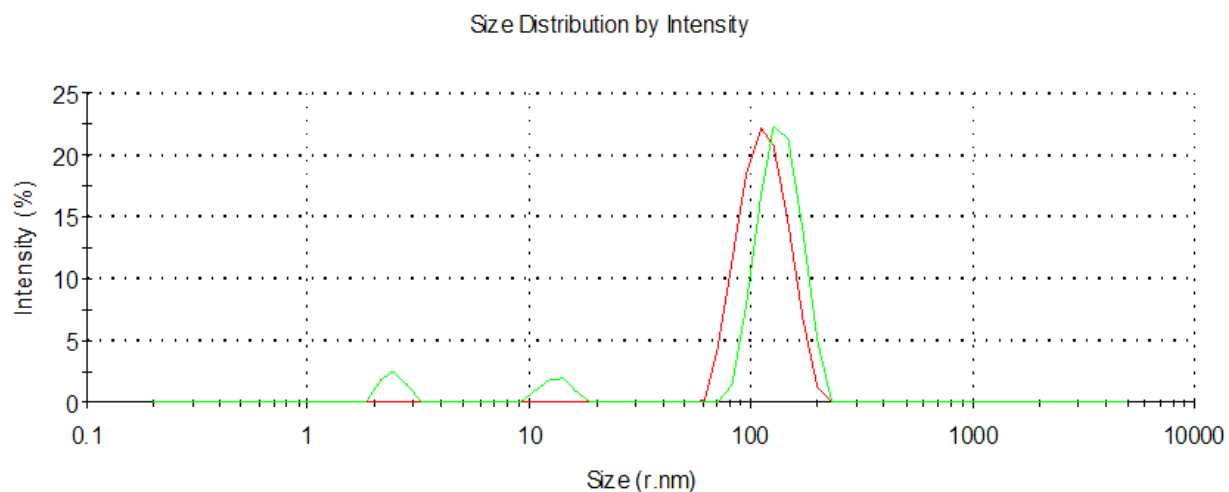

**Fig. S1.** Hydrodynamic radius measurements of MnNPs dispersion after 12hr (red line) and 24hr (green line). No significant changes were noted between the two exhibiting a stable dispersion.

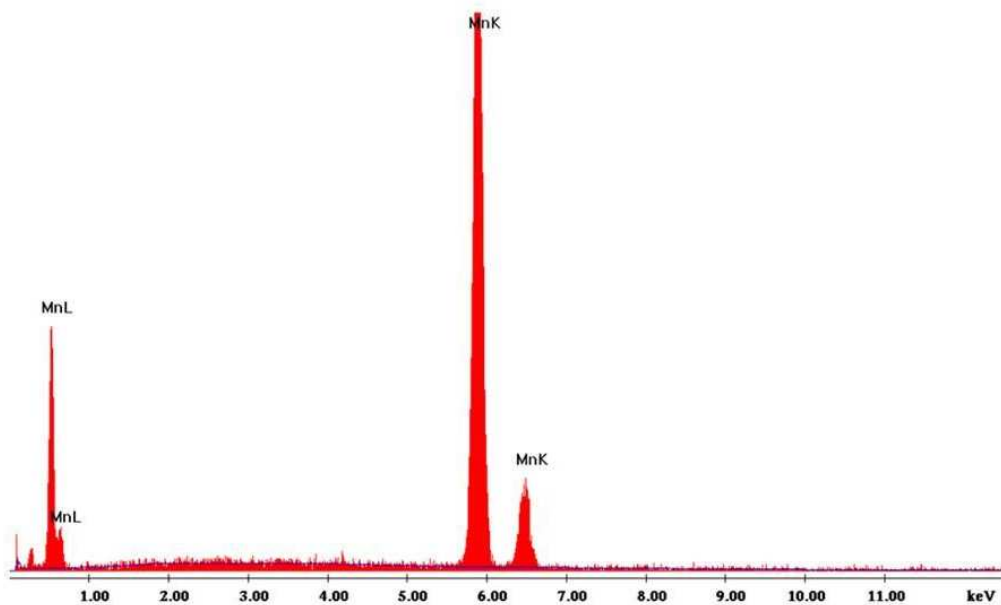

**Fig. S2.** EDX spectrum of MnNPs, which showed Mn was present as the main chemical components.

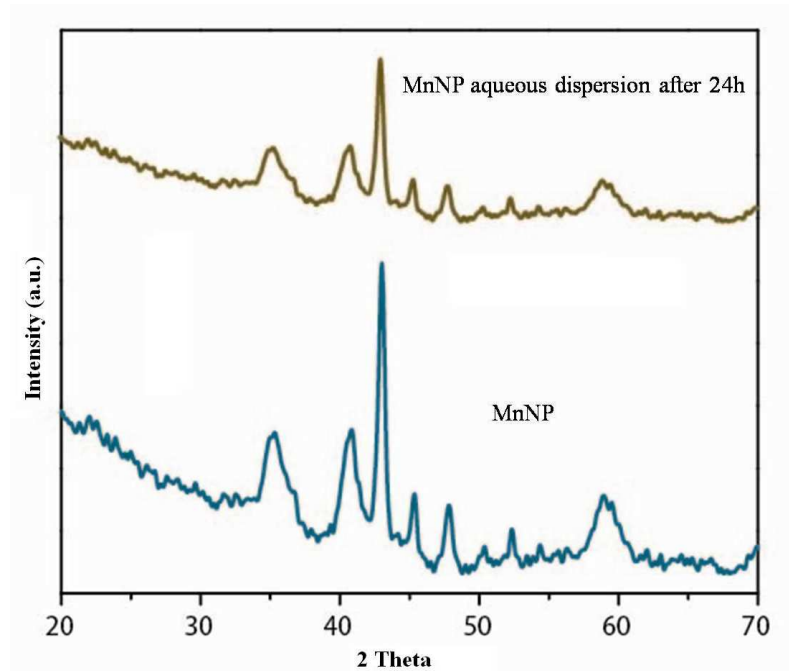

**Fig. S3.** XRD pattern of MnNPs and MnNPs dispersion after 24hr. No significant changes were noted in the pattern which claimed its stability.

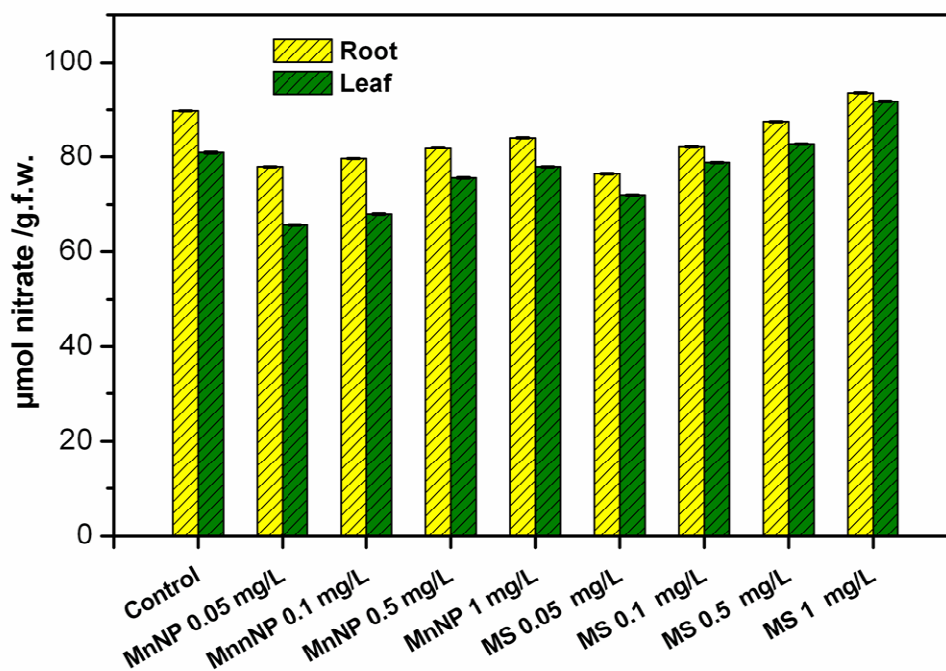

**Fig. S4.** Effect of MnNP and MS on  $\text{NO}_3^-$  concentration of 15days treated mung bean plants.

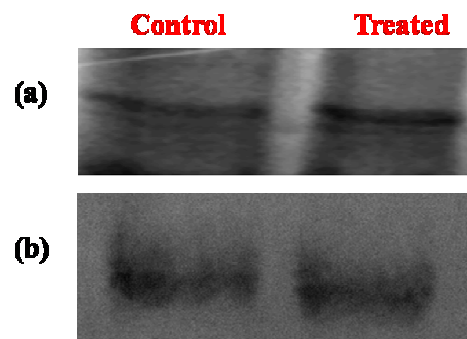

**Fig S5.** (a) SDS-PAGE analysis of isolated NR protein from control and treated leaf tissue, (b) Western blot images of isolated NR protein of control and treated leaf tissue of mung bean plant.

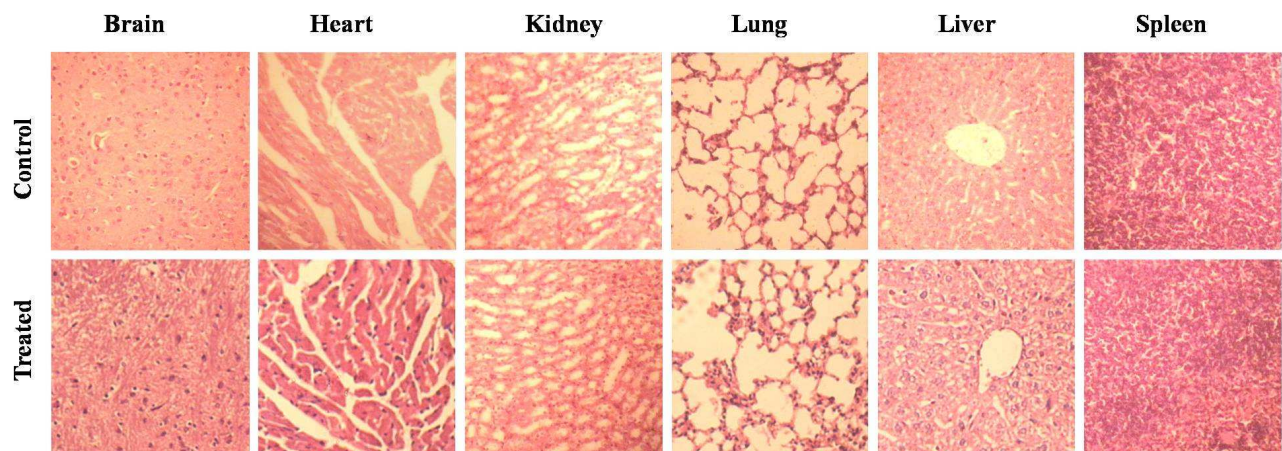

**Fig. S6.** Histological analysis of MnNP treated major organs of mice.

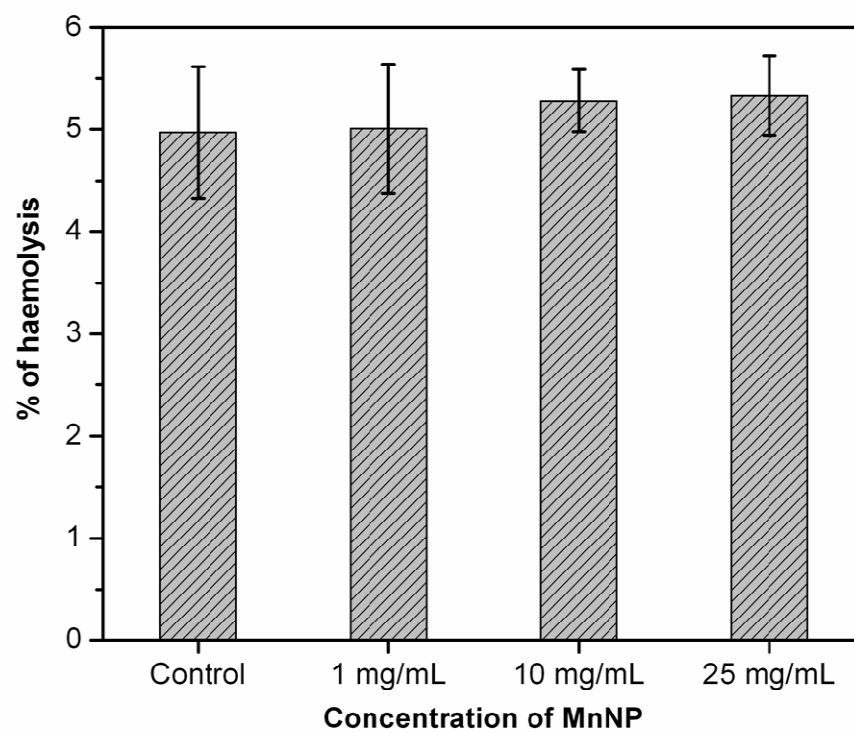

**Fig. S7.** Effect of MnNP on haemolysis of human blood samples.

**SI Table 1:** Body weight of MnNP treated and untreated (control) mice in intraveinuous toxicity assay.

| Animal                | Control       | Mn-1mg/L      | Mn-10mg/L     | Mn-25mg/L     |
|-----------------------|---------------|---------------|---------------|---------------|
| Mice body weight (gm) | 20.933 ±1.629 | 19.967 ±1.604 | 21.867 ±1.387 | 21.167 ±1.739 |

| Parameters                   |                                | Control       | MnNP            |                 |                 |
|------------------------------|--------------------------------|---------------|-----------------|-----------------|-----------------|
|                              |                                |               | 1mg/L           | 10mg/L          | 25mg/L          |
| Hemoglobin (g/dl)            |                                | 15.57± 0.8145 | 15.1667± 0.1528 | 15.067± 0.2517  | 15.133± 0.01528 |
| Total Count                  | RBC (million/mm <sup>3</sup> ) | 5.03±0.5686   | 4.767± 0.2517   | 4.9±0.2646      | 5.0333±.1528    |
|                              | WBC(million/mm <sup>3</sup> )  | 6150±217.9449 | 6133.333±208.17 | 5333.333±152.75 | 5933.33±404.15  |
| Differential Count (%)       | Neutrophils                    | 39±3.6056     | 39.667±4.163    | 40±2            | 39.33±6.6583    |
|                              | Lymphocytes                    | 25±2          | 33.67±4.16      | 35.33±2.082     | 33±2            |
|                              | Monocytes                      | 2±0           | 2±0             | 2±0             | 2±0             |
|                              | Eosinophils                    | 2±0           | 2±0             | 2±0             | 2.667±0.5774    |
|                              | Basophils                      | 0±0           | 0±0             | 0±0             | 0±0             |
| Plt (lakh/ mm <sup>3</sup> ) |                                | 1.62±0.02     | 1.6±0.01        | 1.79±0.05       | 1.63±0.022      |
| LDH (IU/L)                   |                                | 224.333±15.63 | 223±11.53       | 231.67±10.41    | 215.67±6.028    |
| Creatinine (mg/dl)           |                                | 0.85±0.025    | 0.88±0.027      | 0.91±0.04       | 0.93±0.04       |
| ALP (U/L)                    |                                | 71.33±3.21    | 71±2            | 72±3            | 70.33±1.53      |
| Total Protein (gm/dl)        |                                | 6.83±0.15     | 7.033±0.15      | 6.93±0.25       | 6.8±0.26        |
| Cholesterol (mg/dl)          |                                | 153.33±11.06  | 151.07±12.22    | 155±7           | 154±6.557       |
| Triglyceride (mg/dl)         |                                | 92.67±2.52    | 92±6.08         | 90.33±5.51      | 103.33±10.41    |
| Uric Acid (mg/dl)            |                                | 6.43±0.40     | 6.27±0.25       | 6.77±0.15       | 6.63±0.252      |
| BUN (mg/dl)                  |                                | 11±1          | 12±2            | 12.67±1.53      | 12.33±1.528     |
| SGOT (Unit/L)                |                                | 33.33±3.51    | 34.33±3.2       | 35.67±2.08      | 35.67±3.055     |
| SGPT (Unit/L)                |                                | 30.33±3.01    | 32.67±1.53      | 31±2            | 35.33±2.517     |
| Phosphorous (mg/dl)          |                                | 3.53±0.25     | 3.1±0.26        | 3.26±0.31       | 3.37±0.15       |

**SI Table 2** Comparison of blood biochemical parameters between control and MnNP treated mice.

For the final dataset that was analysed, we observed that only two of the characteristics were significant as per the ANOVA test- they are Platelets and WBC. We performed Tukey's post-hoc test on these two cells and the following table presents the analysis

#### Platelets

| Control | Mn 1 ppm | Mn 10 ppm | Mn 25 ppm |
|---------|----------|-----------|-----------|
| A       | A        | B         | C         |

#### WBC cells

| Control | Mn 1 ppm | Mn 10 ppm | Mn 25 ppm |
|---------|----------|-----------|-----------|
| A       | A        | B         | C         |

The above result is quite intuitive from the box plot of the Platelets and the WBC cells attached.

| Experiments   | F val | P val |
|---------------|-------|-------|
| Haemoglobin   | 0.79  | 0.53  |
| RBC           | 1.47  | 0.29  |
| WBC           | 6.32  | 0.02  |
| Neutrophil    | 0.03  | 0.99  |
| Lymphocyte    | 8.58  | 0.01  |
| Platelet      | 28.59 | 0.00  |
| LDH           | 0.99  | 0.45  |
| Creatinine    | 2.25  | 0.16  |
| ALP           | 0.23  | 0.88  |
| Total protein | 0.74  | 0.56  |
| Cholesterol   | 1.12  | 0.40  |
| Triglyceride  | 2.31  | 0.15  |
| Uric acid     | 1.85  | 0.22  |
| BUN           | 0.64  | 0.61  |
| SGOT          | 0.43  | 0.74  |
| SGPT          | 2.71  | 0.12  |

Statistical analysis of blood pathological analysis of MnNP treated mice after intravenous injection

## Box plot of the statistical analysis of all biochemical studies with control, MnNP and MS treatments

In case cases 1=control, 2=0.05 mg/L, 3=0.1 mg/L, 4=0.5 mg/L, 5=1 mg/L (biochemical tests in plants) and 1=control, 2=1ppm, 3=10ppm and 4=25ppm (biosafety experiments)

### 1. Determination of $\text{NO}_3^-$

- MnNP leaf

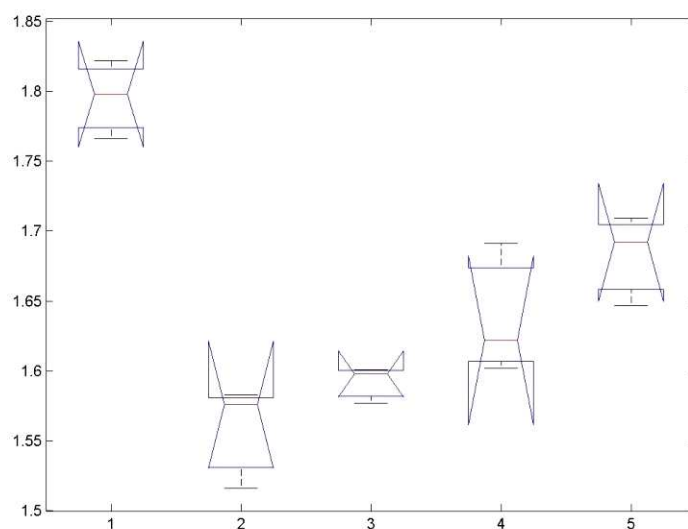

- MnNP root

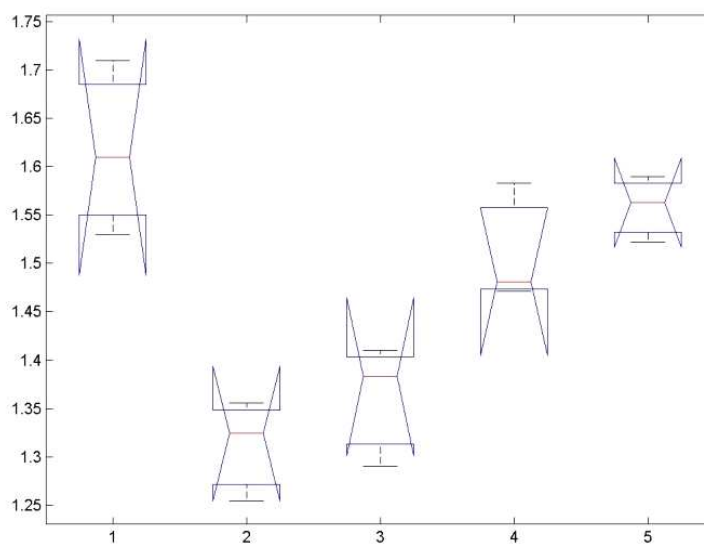



- MS leaf

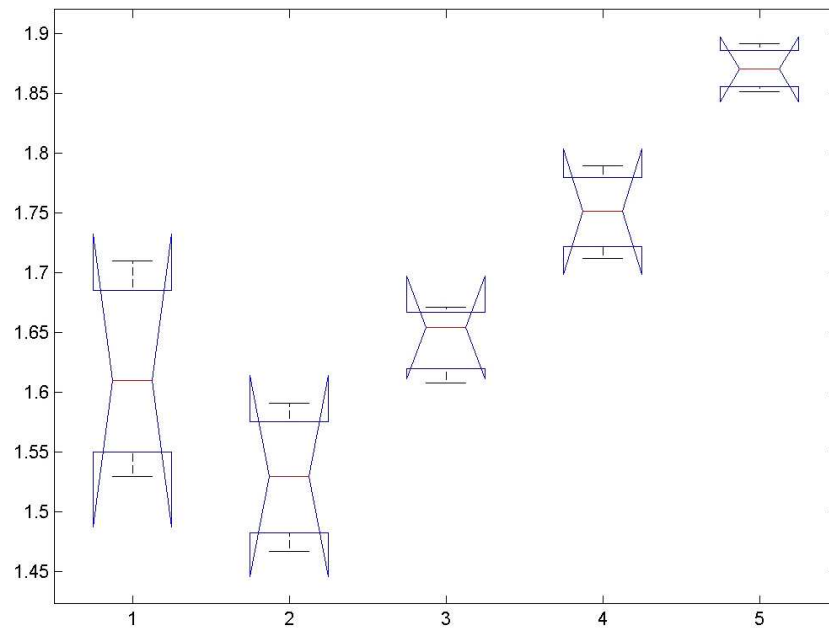

- MS root

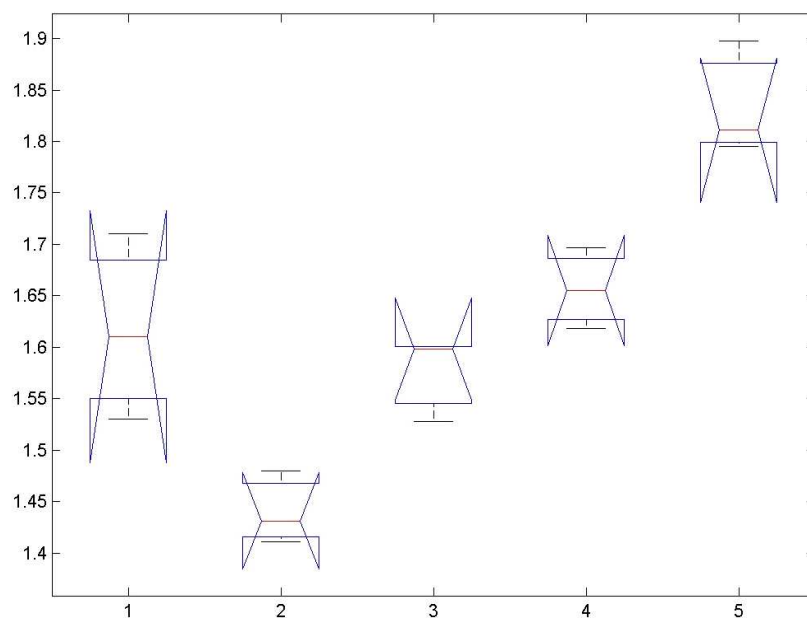

## 2. Determination of nitrate Reductase (NR) activity

- MnNP leaf

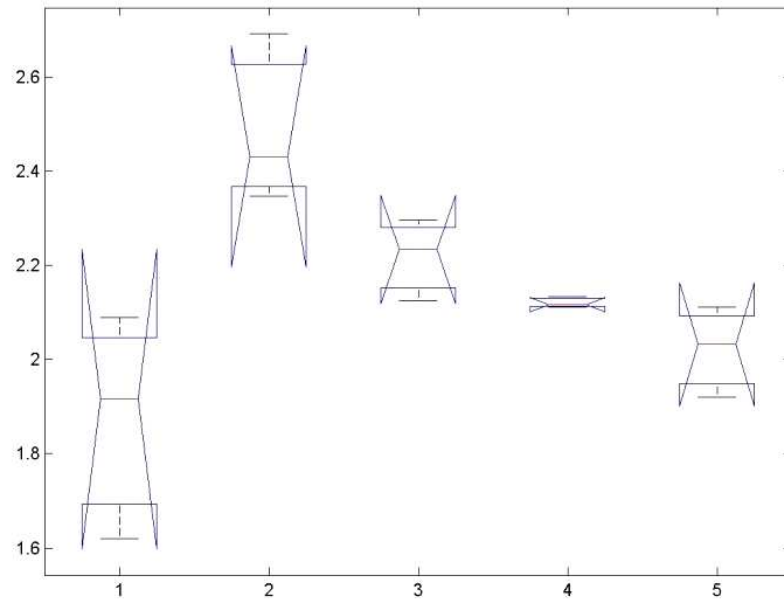

- MnNP root

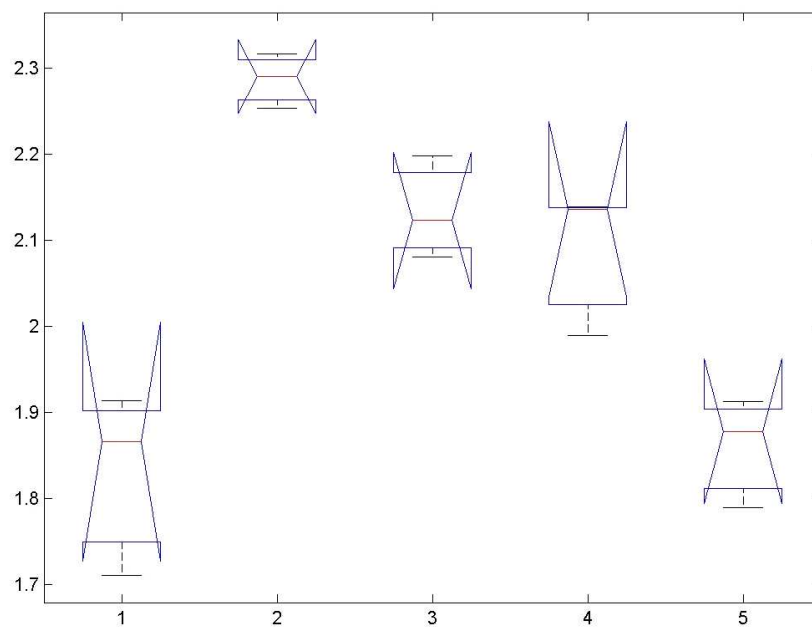

- MS leaf

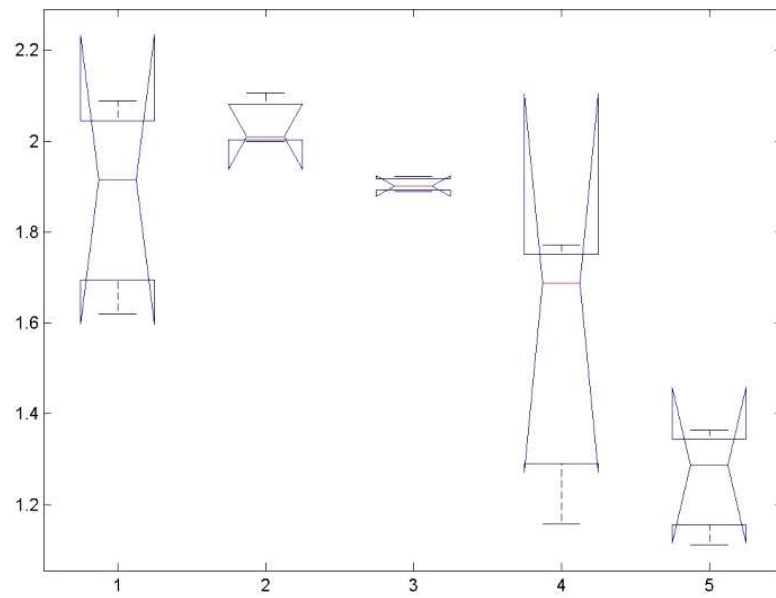

- MS root

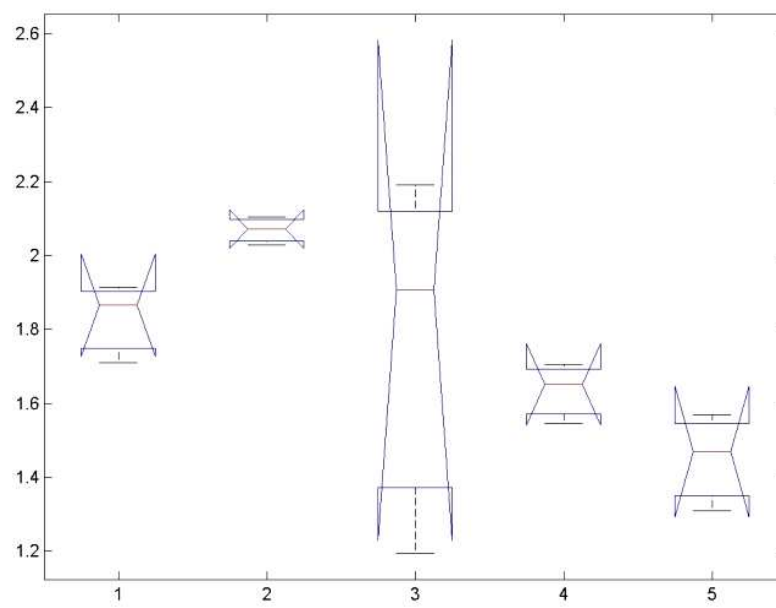

### 3. Determination of nitrite reduction (NiR) activity

- MnNP leaf

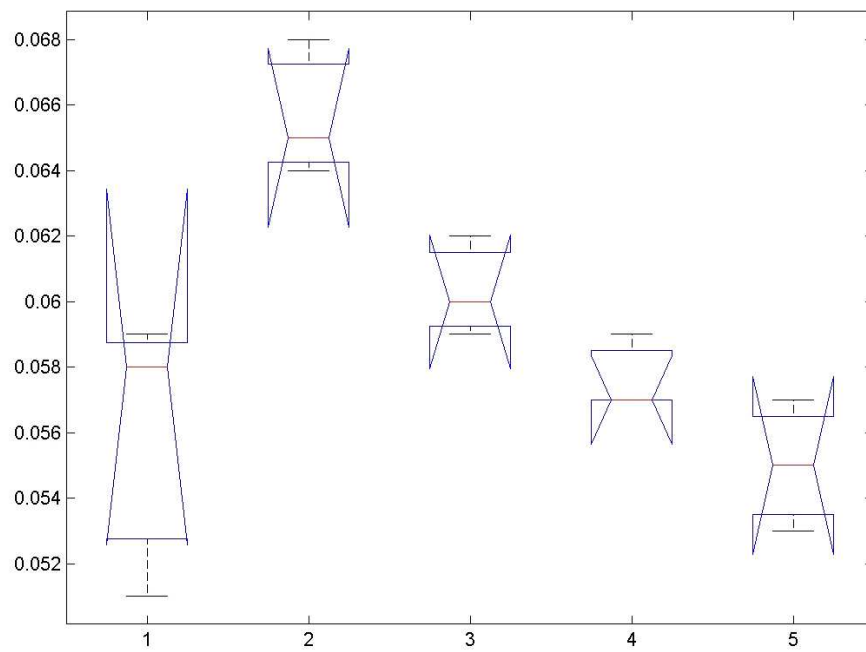

- MnNP root

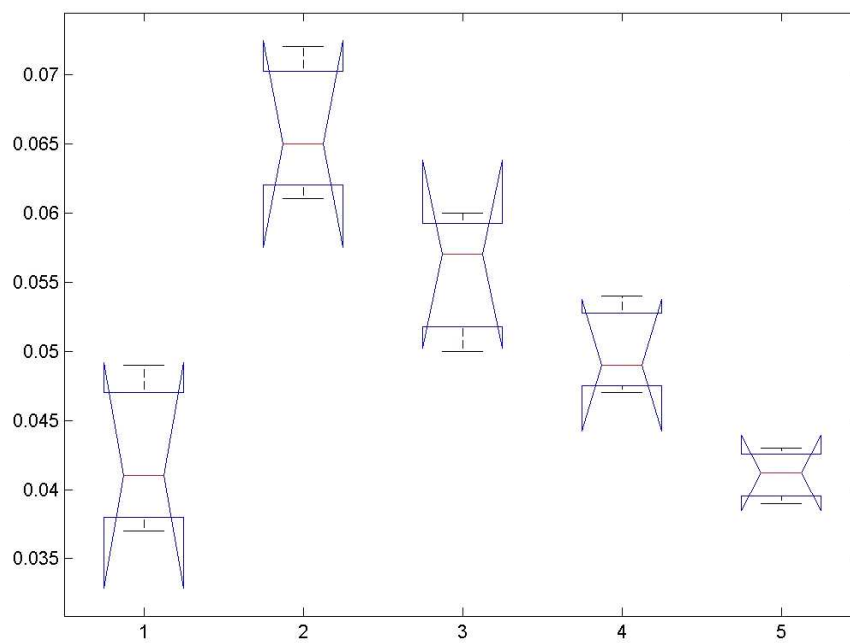

- MS leaf

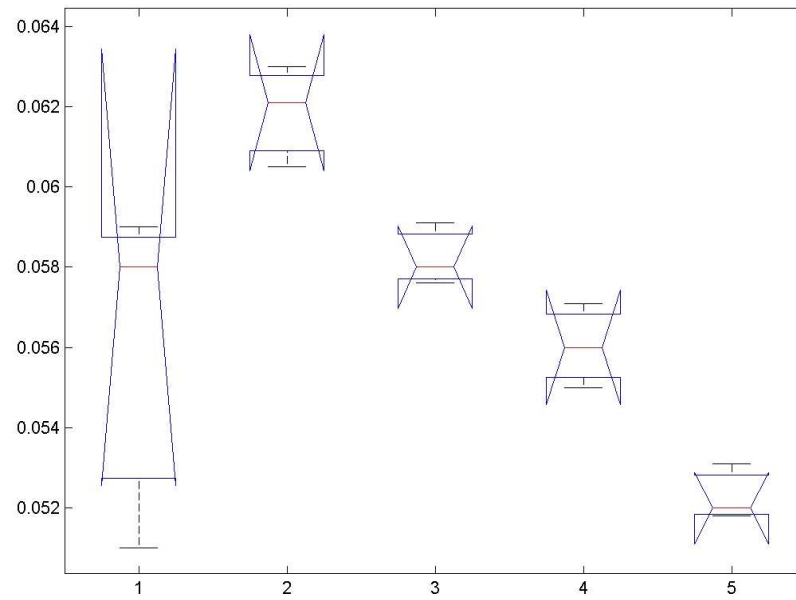

- MS root

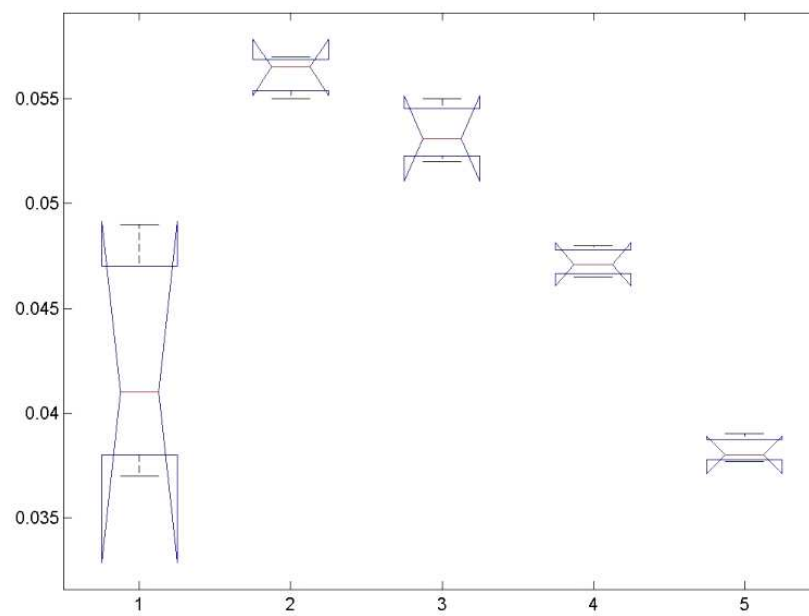

4. Determination of glutamine synthetase (GS) activity

- MnNP leaf

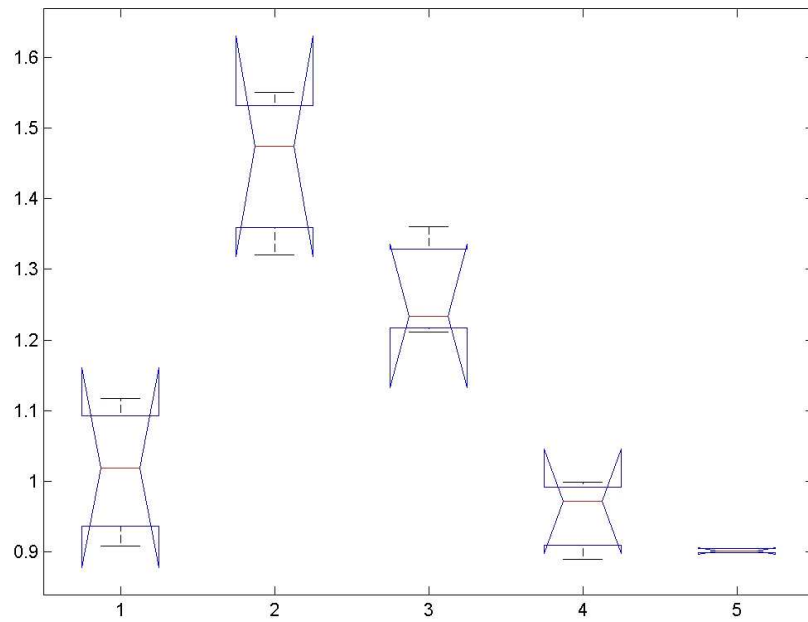

- MnNP root

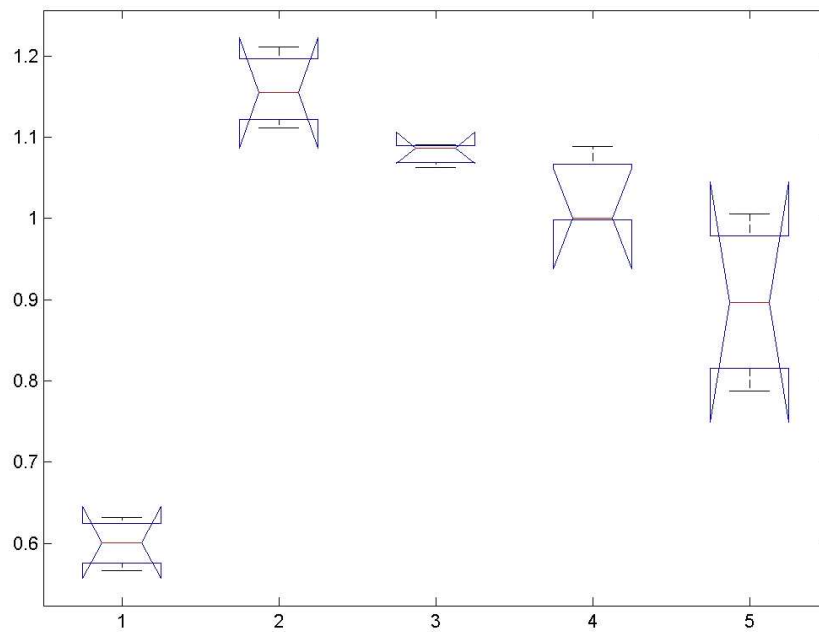

- MS leaf

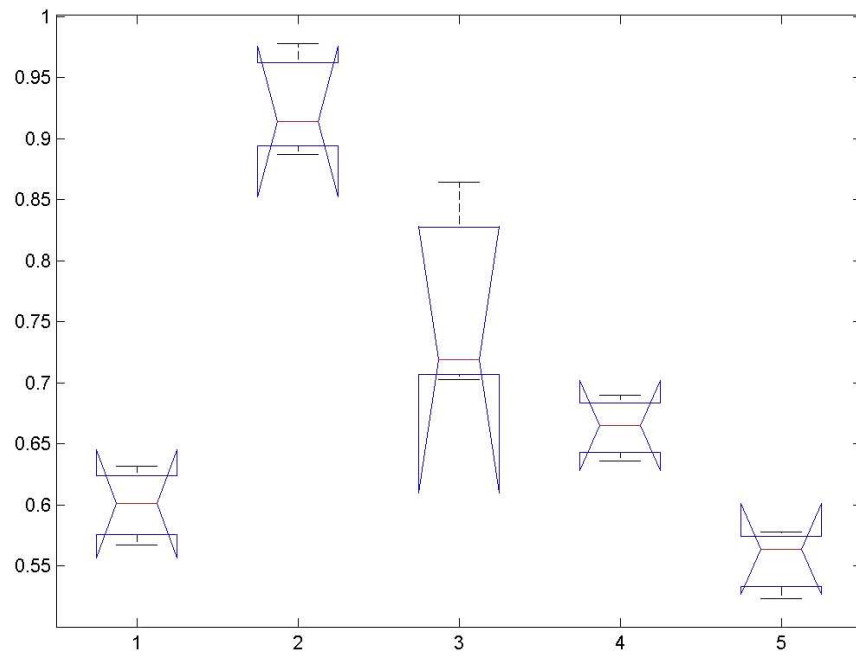

- MS root

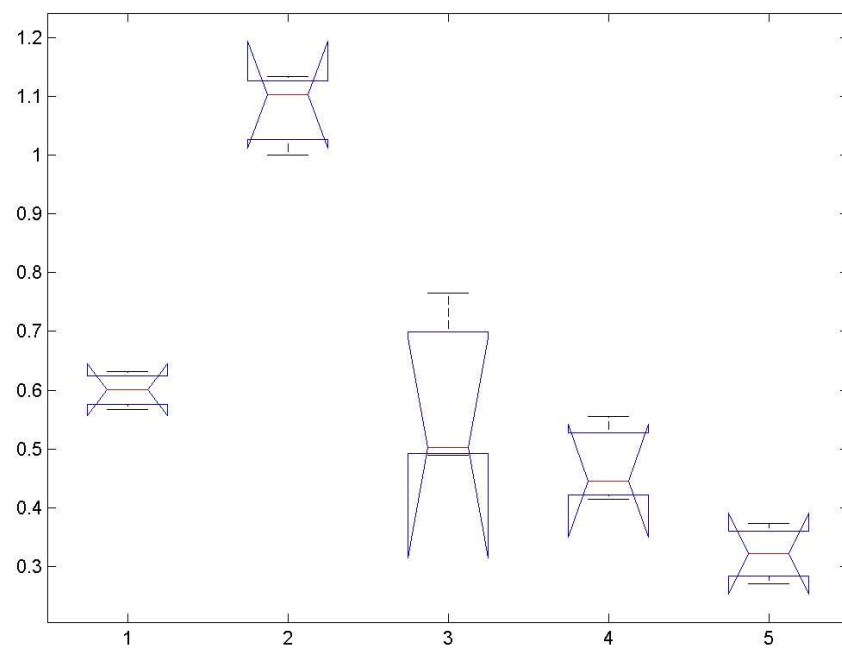

5. Determination of NADH-glutamate synthase (GOGAT) activity  
MnNP leaf

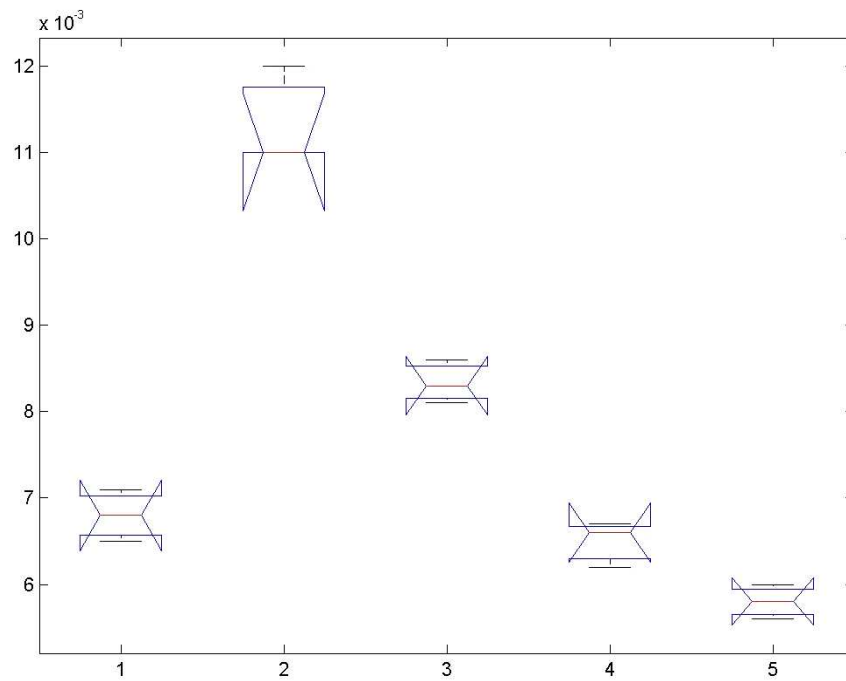

• MnNP root

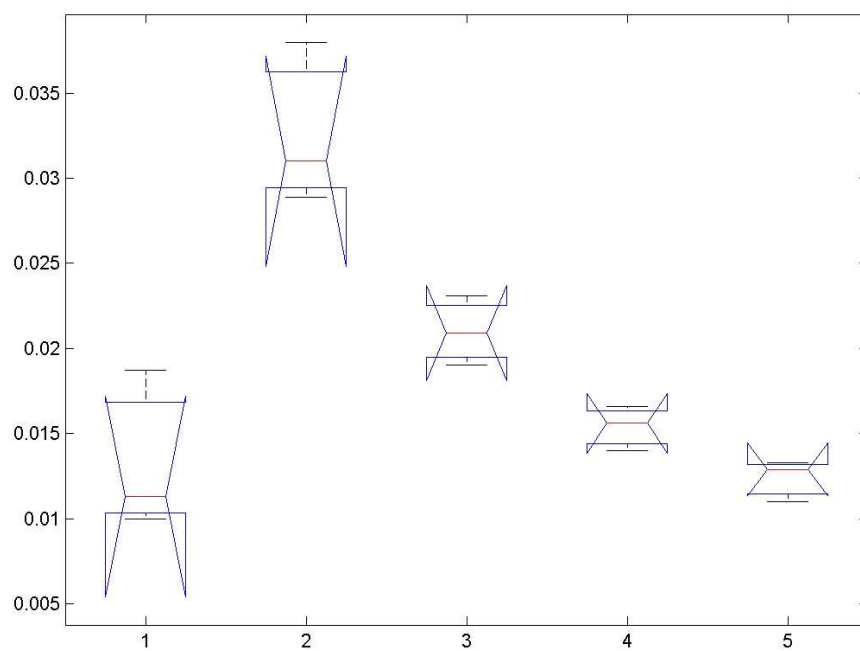



- MS leaf

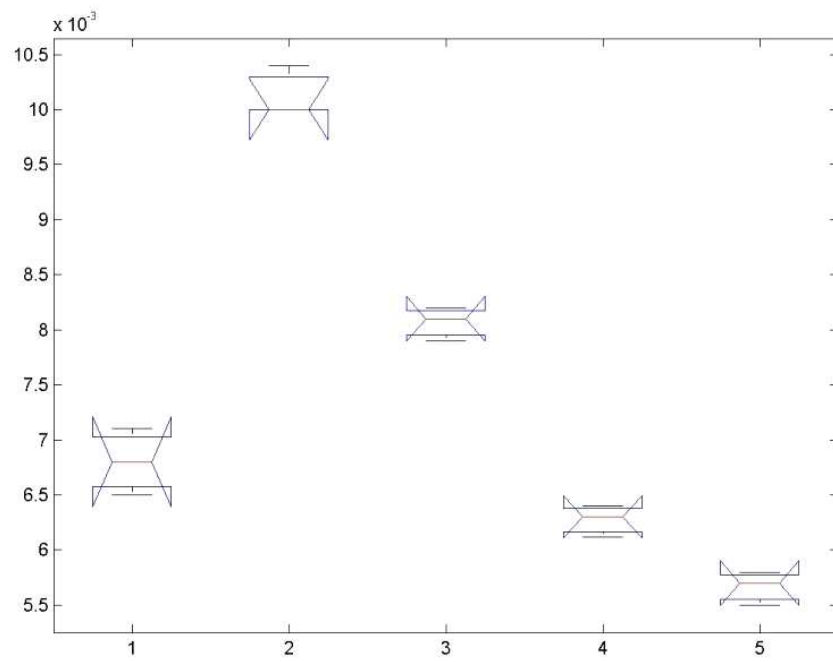

- MS root

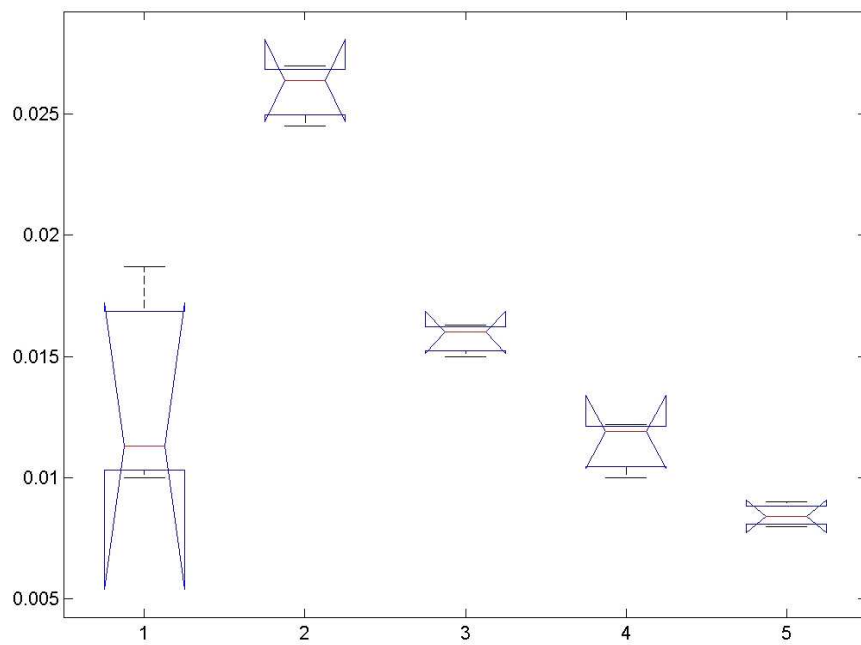

## 6. Measurement of phosphate utilization of mitochondria

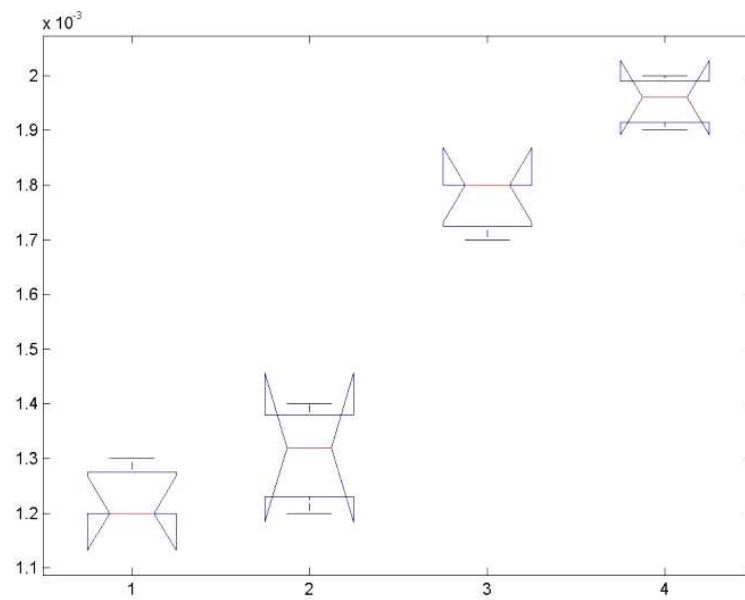

## 7. Complex I activity

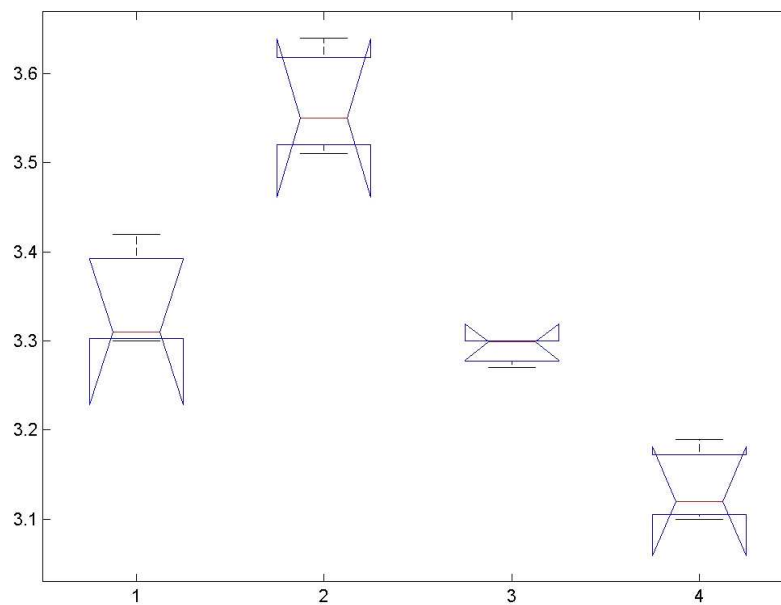

## 8. Complex II-III activity

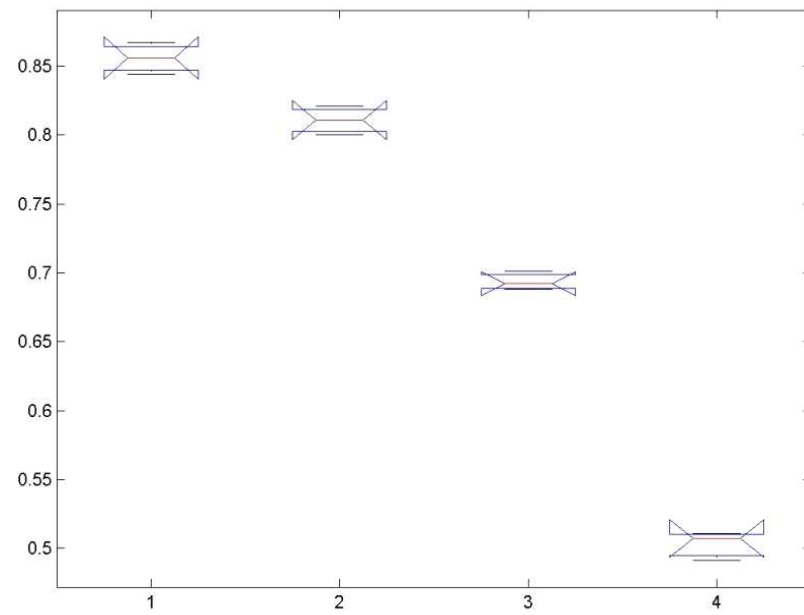

## 9. Complex IV activity

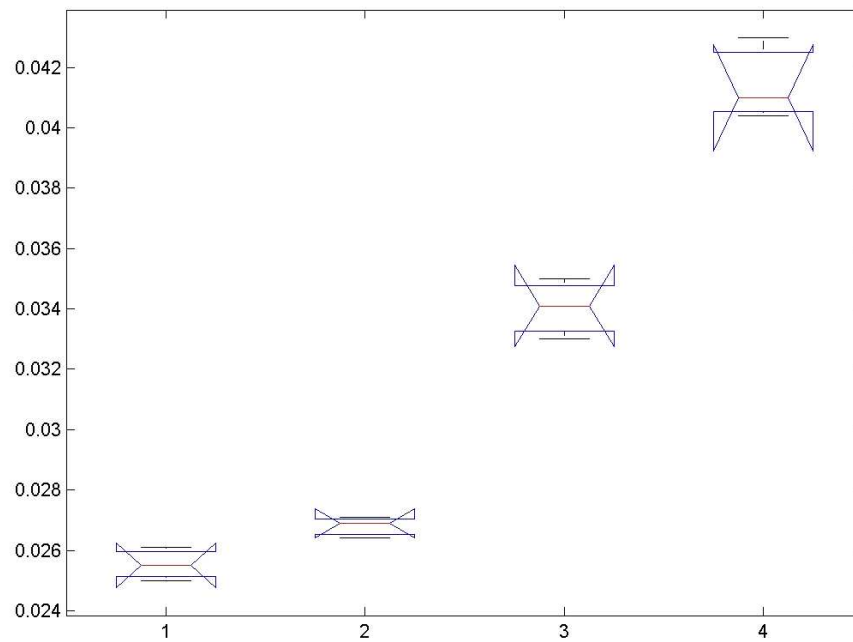

10. Mitochondrial respiratory control ratio (RCR)

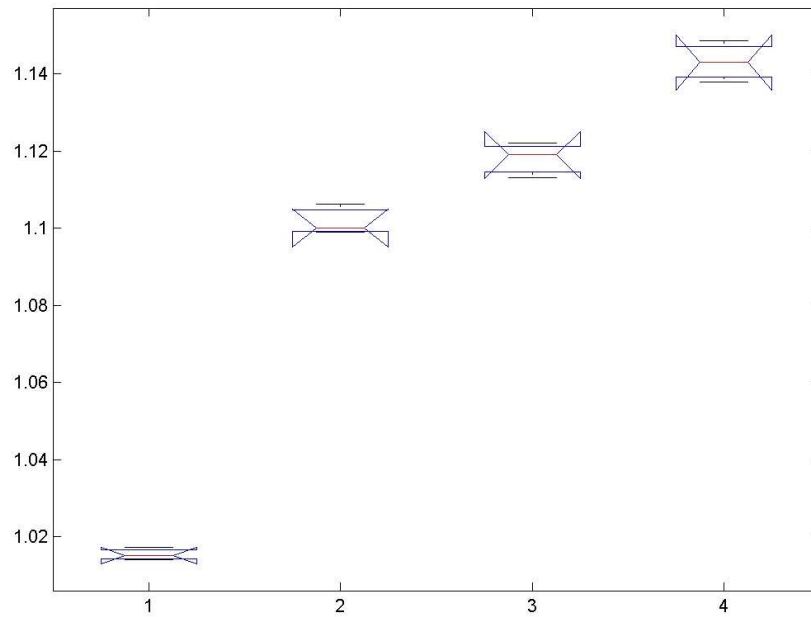

11. Measurement of ROS

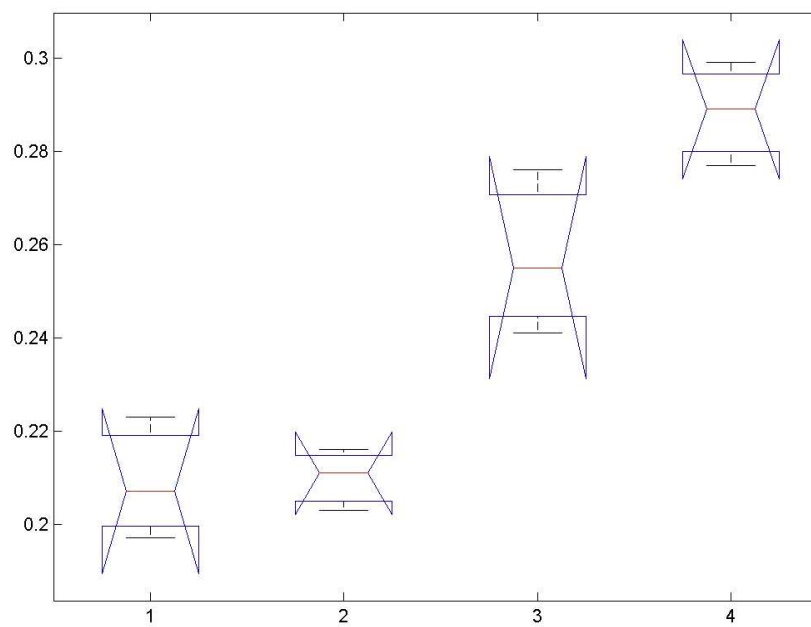

12. WST assay

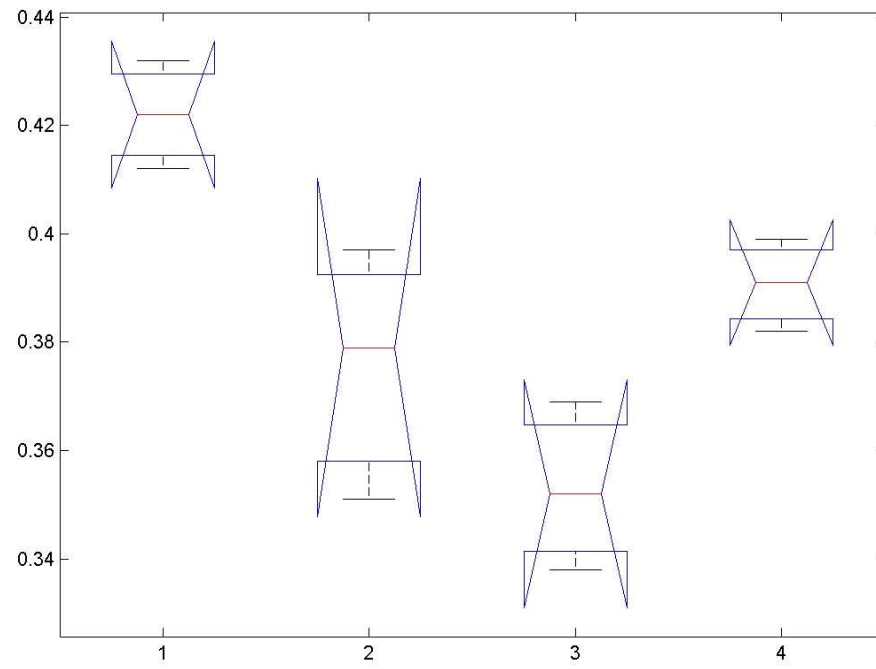

13. NO content

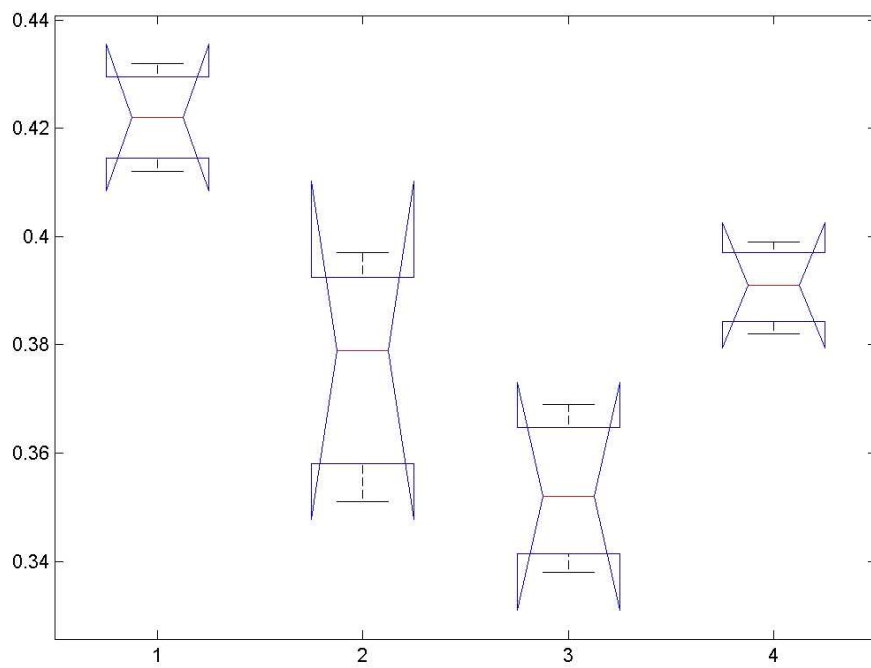

#### 14. LDH assay

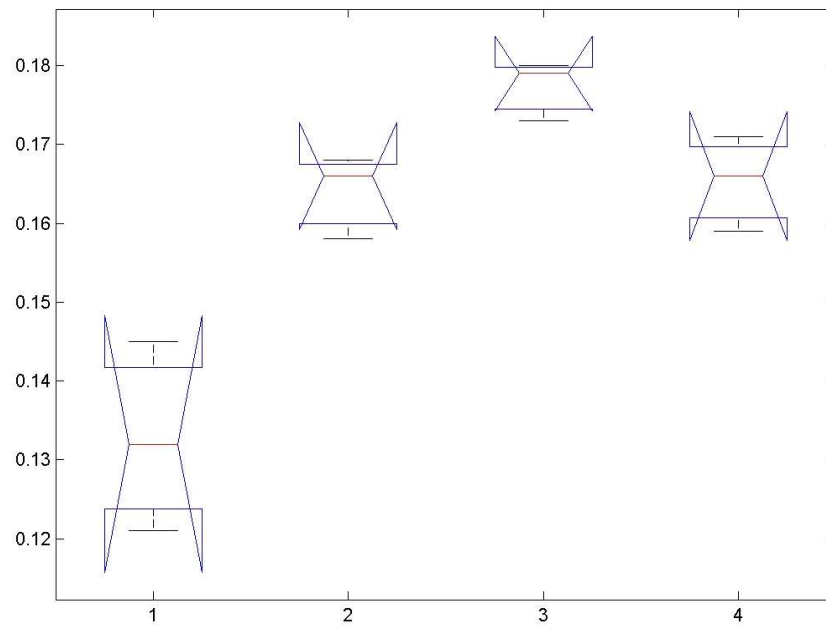

#### 15. Blood pathological analysis

- ALP

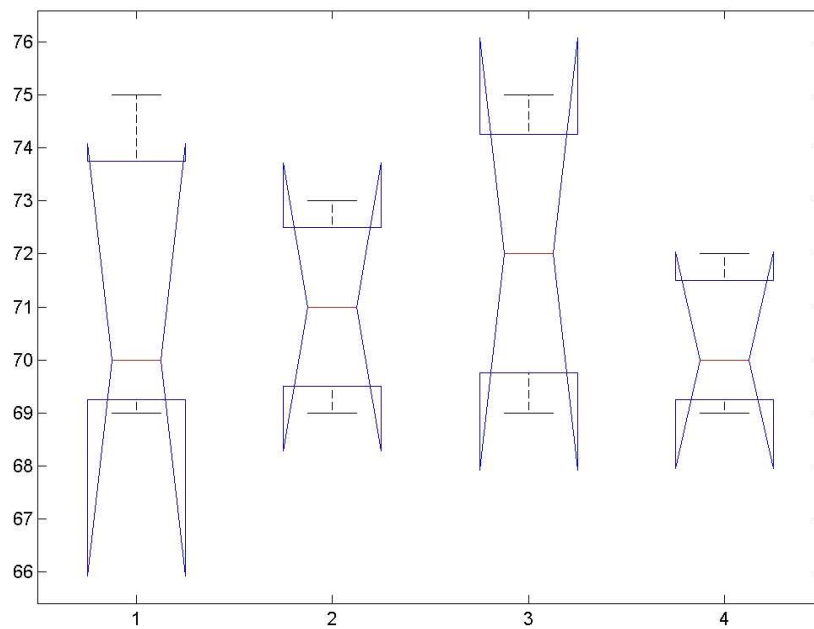

- BUN

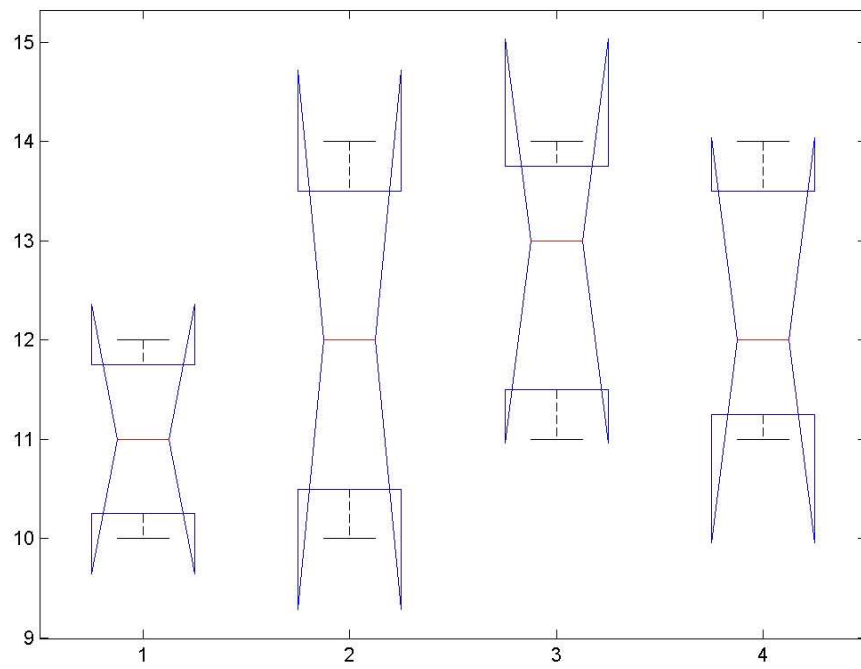

- Cholesterol

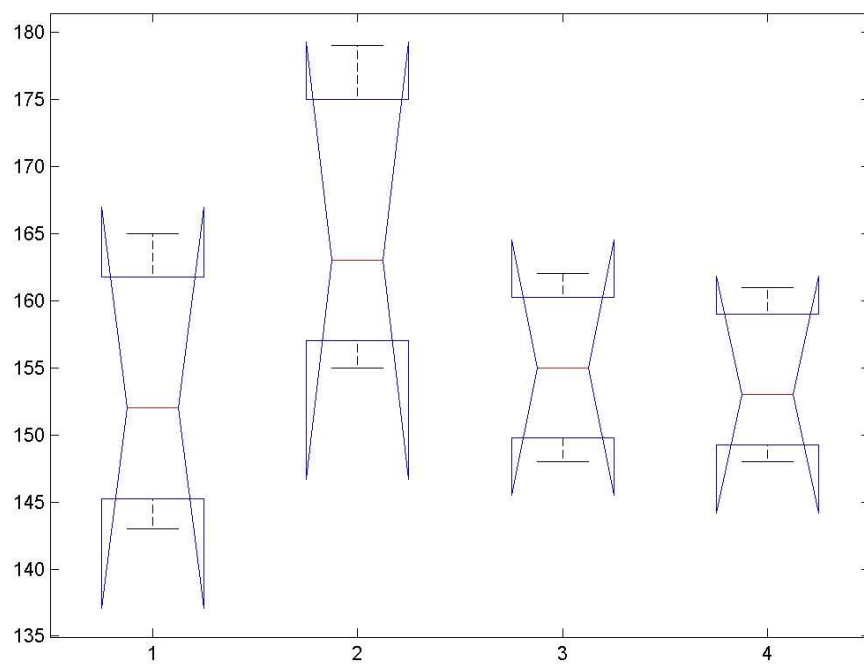

- 

## Creatinine

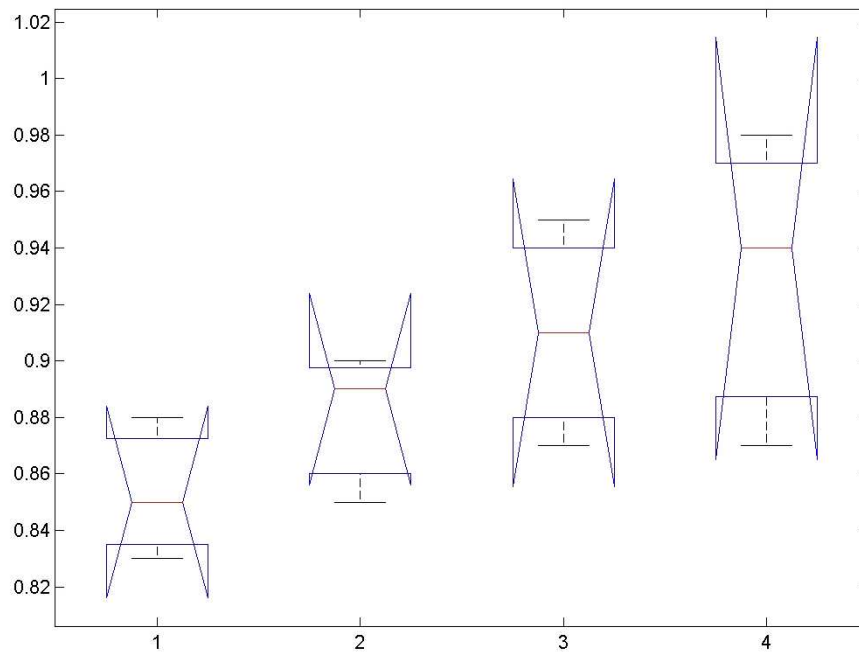

- Haemoglobin

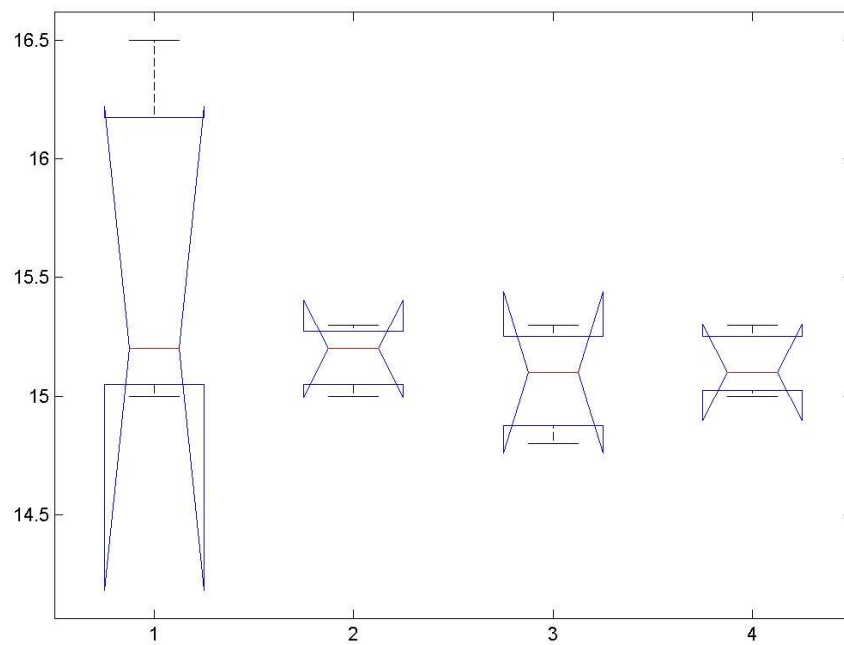



- 

## LDH

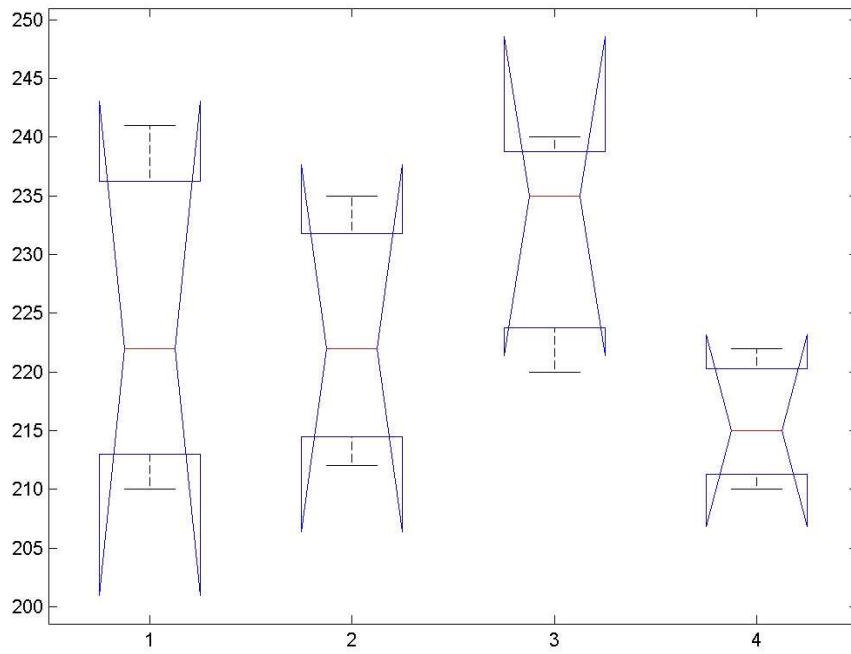

- Lymphocyte

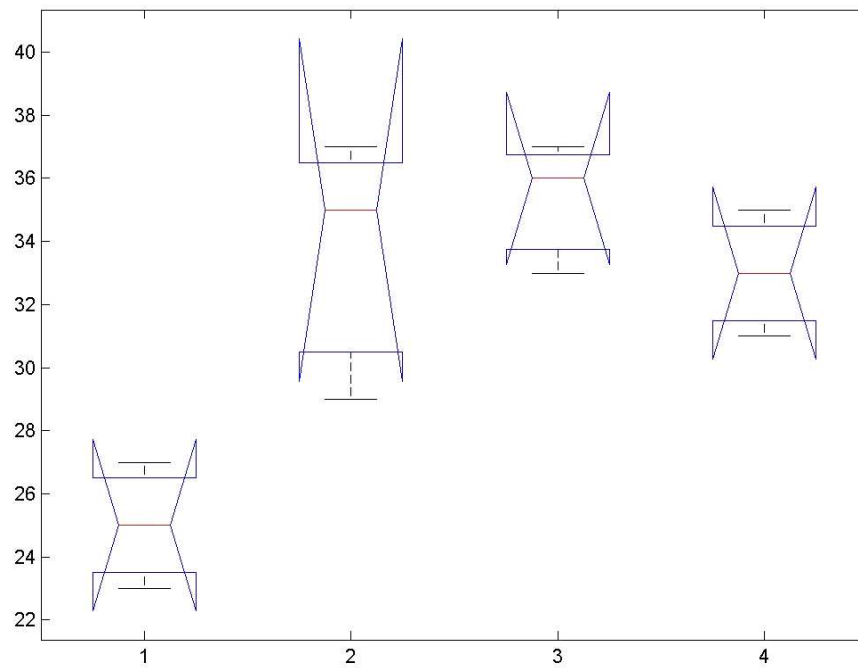

- 

### Neutrophils

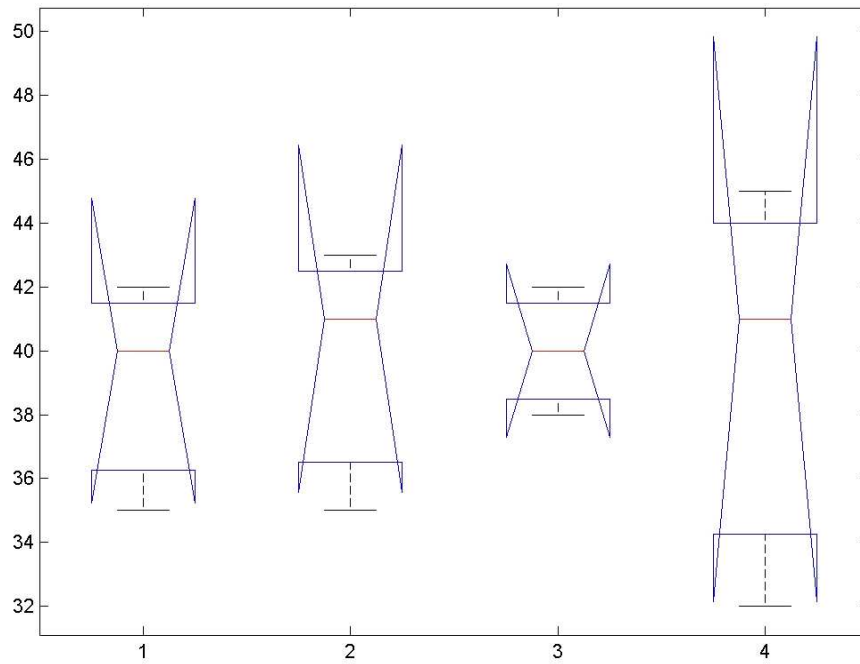

- Packed cell volume

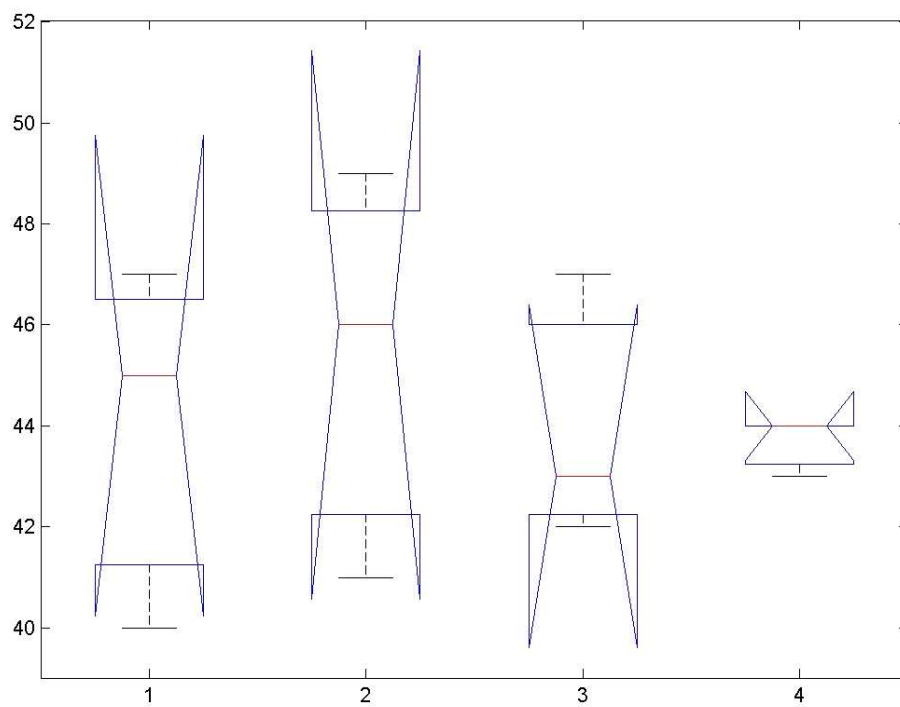

- Phosphorus

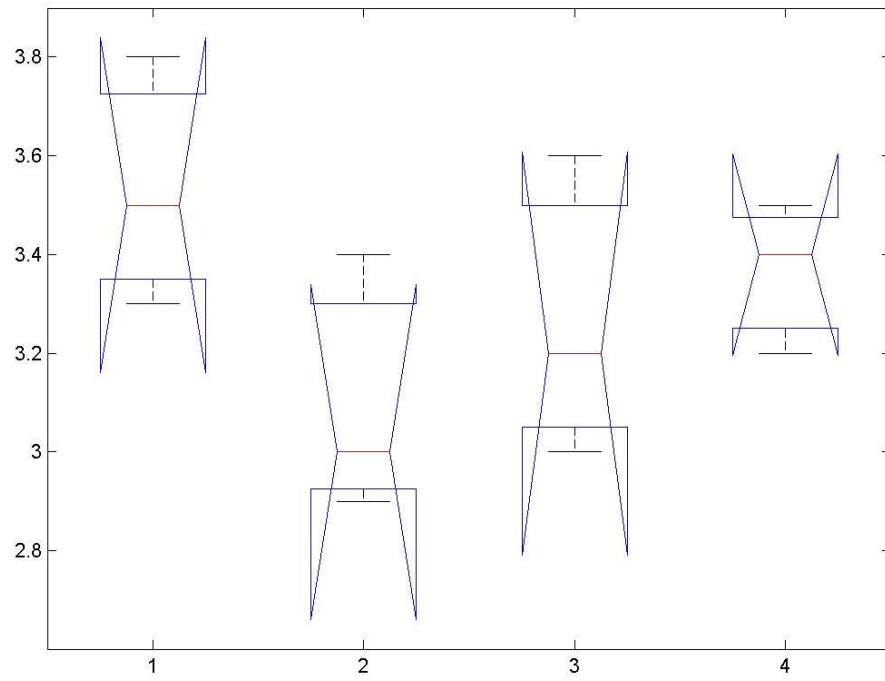

- Platelet

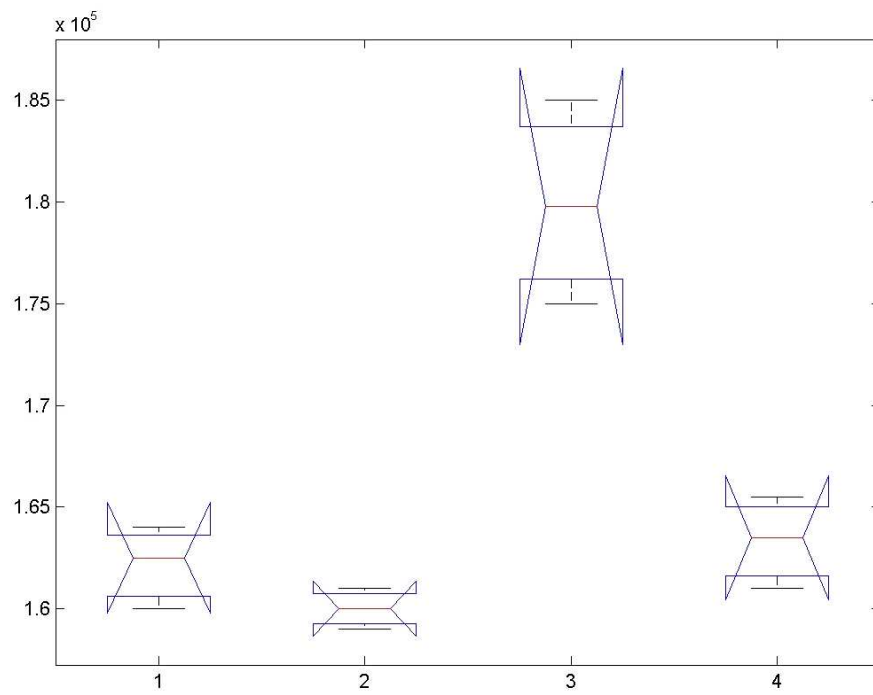

- RBC

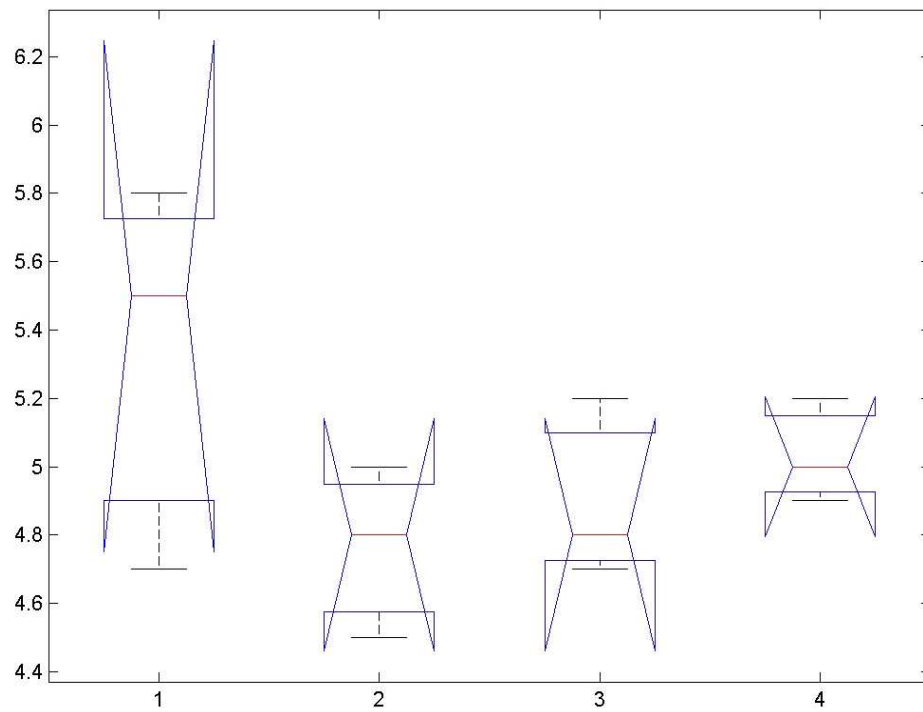

- SGOT

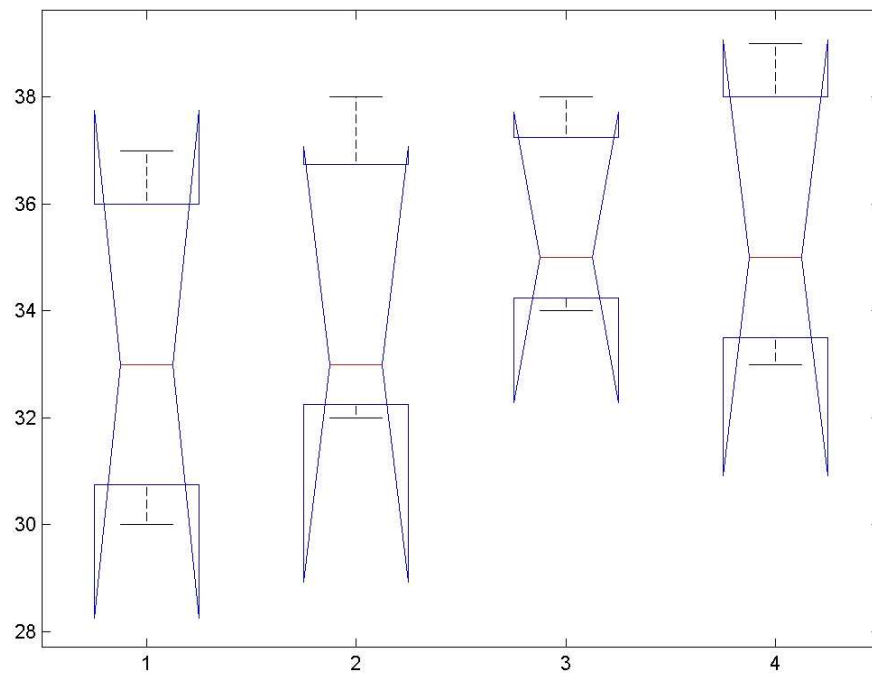

- SGPT

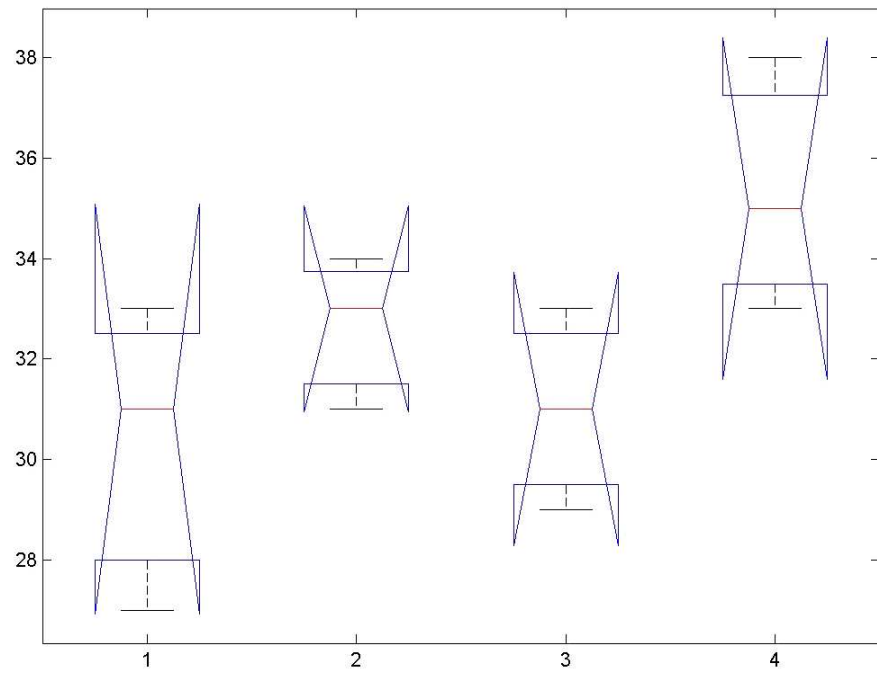

- Total protein

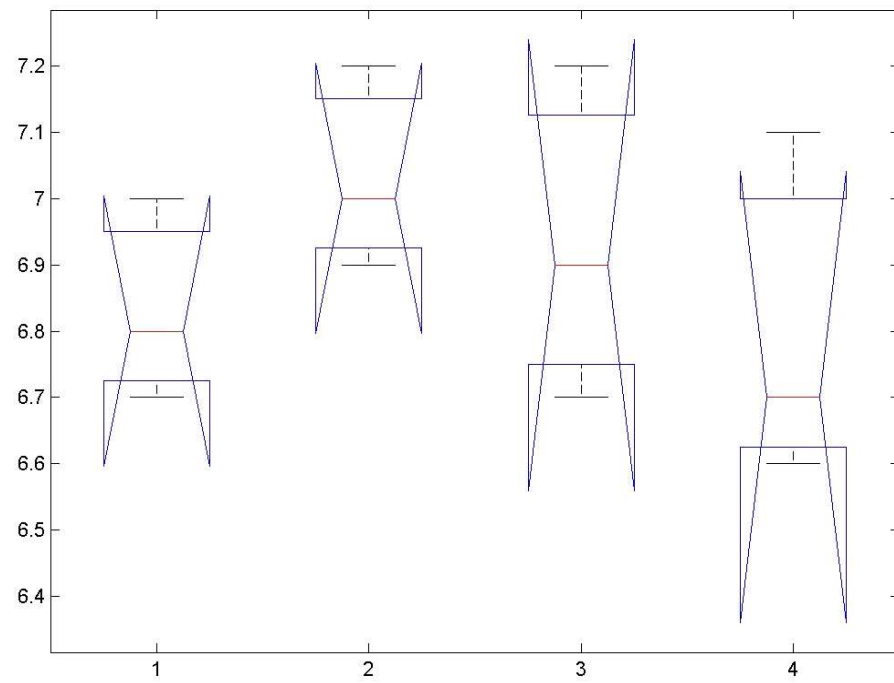

- 

Triglyceride

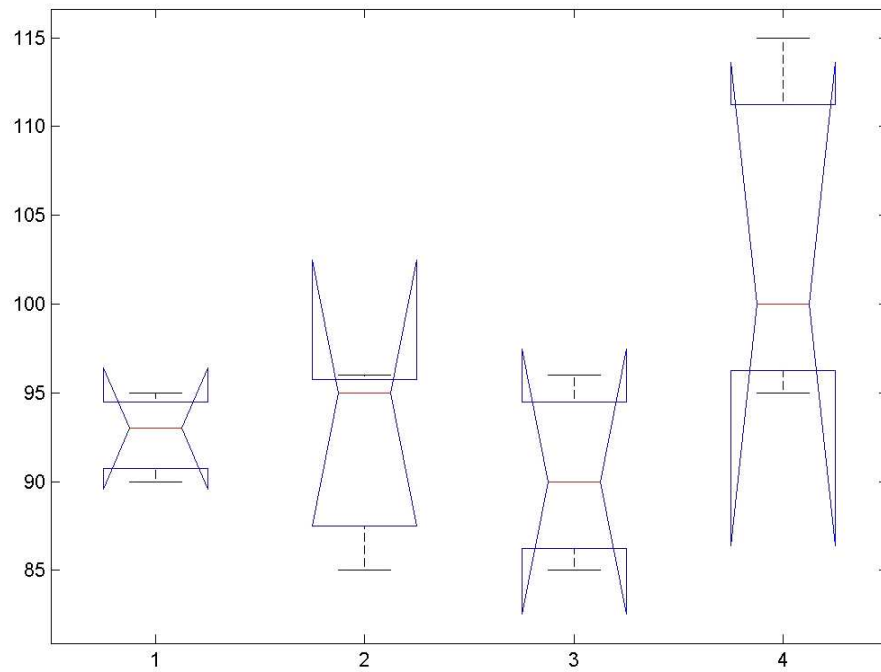

- Uric acid

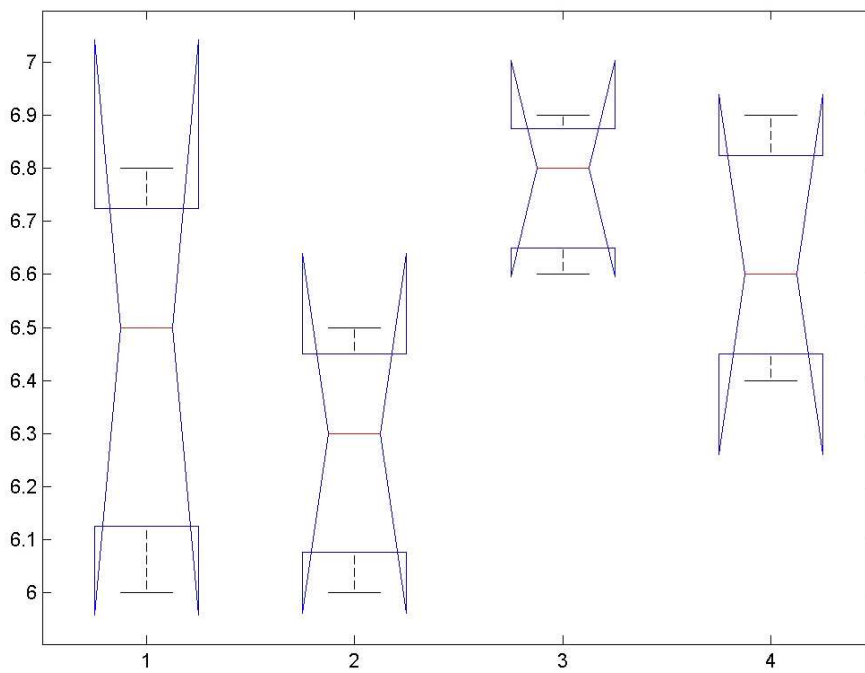

- WBC

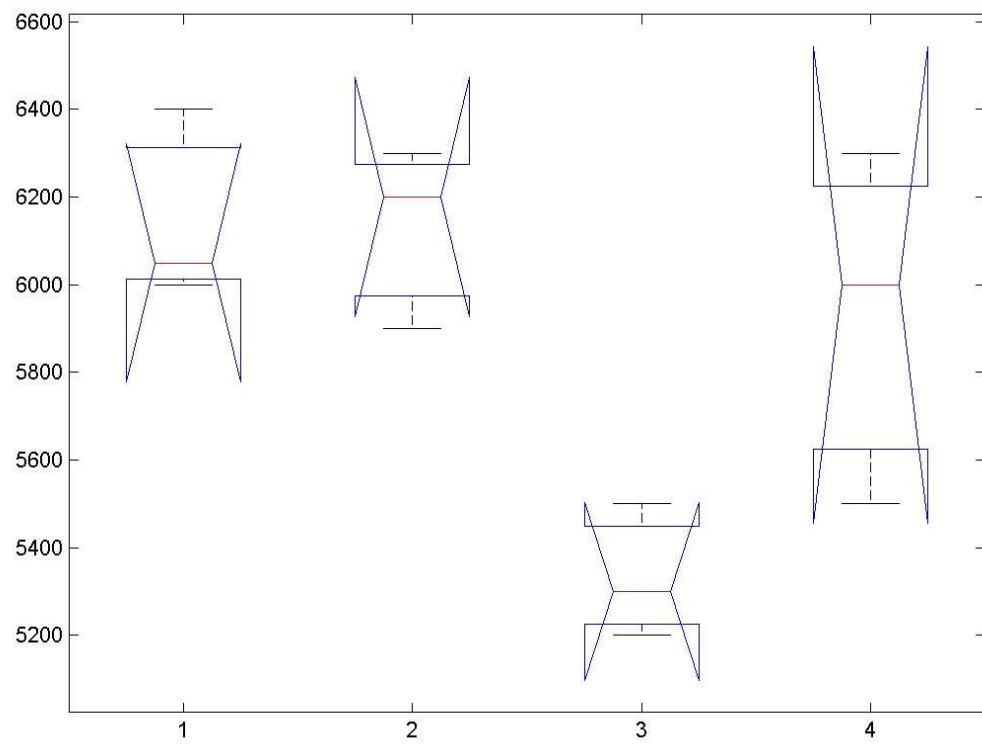

Supplement: Supplementary file 1 [file 3894874]
